# Supplementary material
Source: ML conference proceedings conference paper supplement (https://openaccess.thecvf.com/content/WACV2024/html/Ben-Shabat_IKEA_Ego_3D_WACV_2024_paper.html)
Supplement: Supplementary file 1 [file Ben-Shabat_IKEA_Ego_3D_WACV_2024_supplemental.pdf]

# IKEA Ego 3D dataset: Understanding furniture assembly actions from ego-view 3D Point Clouds

## Supplementary Material

### A. Action list

For completeness, we provide here a full list of actions and their IDs in Table 5.

| class ID | Atomic action                           |
|----------|-----------------------------------------|
| 0        | NA                                      |
| 1        | align coffee tabletop secondary         |
| 2        | align drawer knob screw                 |
| 3        | align elbow connector                   |
| 4        | align leg                               |
| 5        | align long coffee table screw           |
| 6        | align long drawer screw                 |
| 7        | align small screw                       |
| 8        | align stool beam                        |
| 9        | align top stool step                    |
| 10       | application interface                   |
| 11       | attach back panel                       |
| 12       | attach bottom stool step                |
| 13       | attach side panel                       |
| 14       | attach stool side                       |
| 15       | flip coffee tabletop main               |
| 16       | flip leg                                |
| 17       | flip partially constructed coffee table |
| 18       | flip stool                              |
| 19       | flip table top                          |
| 20       | flip whole coffee table                 |
| 21       | flip whole drawer                       |
| 22       | insert cam lock                         |
| 23       | insert pin (wood peg)                   |
| 24       | lay down coffee tabletop secondary      |
| 25       | lay down drill                          |
| 26       | lay down screwdriver                    |
| 27       | lay down stool beam                     |
| 28       | lay down stool screw                    |
| 29       | manually insert stool screw             |
| 30       | move top stool step                     |
| 31       | pick up back panel                      |
| 32       | pick up bottom panel                    |
| 33       | pick up bottom stool step               |
| 34       | pick up cam lock                        |
| 35       | pick up coffee tabletop secondary       |
| 36       | pick up drawer knob                     |
| 37       | pick up drawer knob screw               |
| 38       | pick up drill                           |
| 39       | pick up elbow connector                 |
| 40       | pick up front panel                     |
| 41       | pick up leg                             |
| 42       | pick up long coffee table screw         |
| 43       | pick up long drawer screw               |
| 44       | pick up pin (wood peg)                  |
| 45       | pick up screwdriver                     |
| 46       | pick up side panel                      |
| 47       | pick up small screw                     |
| 48       | pick up stool beam                      |
| 49       | pick up stool screw                     |
| 50       | pick up stool side                      |
| 51       | slide bottom panel                      |
| 52       | spin drawer knob                        |
| 53       | spin leg                                |
| 54       | spin screwdriver                        |
| 55       | use drill                               |

Table 5. IKEA Ego3D dataset action list.
